# Supplementary material for: Green synthesis of a magnetite/graphitic carbon nitride 2D nanocomposite for efficient Hg2+ remediation
Source: Royal Society of Chemistry journal article supplement (doi:10.1039/d3en00367a), 2023-01-01
Supplement: d3en00367a1.pdf [file d3en00367a1.pdf]

## Green synthesis of a magnetite/graphitic carbon nitride 2D nanocomposite for efficient Hg<sup>2+</sup> remediation

Raghuraj Singh Chouhan,<sup>a\*</sup> Jan Gačnik<sup>a</sup>, Igor Živković<sup>a</sup>, Sreekanth Vijayakumaran Nair<sup>a,b</sup>, Nigel Van de Velde<sup>c</sup>, Alenka Vesel<sup>d</sup>, Primož Šket<sup>e</sup>, Sonu Gandhi<sup>f\*</sup>, Ivan Jerman<sup>c\*</sup>, Milena Horvat<sup>a\*</sup>

<sup>a</sup>Department of Environmental Sciences, Jožef Stefan Institute, Jamova Cesta 39, 1000 Ljubljana, Slovenia.

<sup>b</sup>Jožef Stefan International Postgraduate School, Jamova Cesta 39, 1000 Ljubljana, Slovenia.

<sup>c</sup>National Institute of Chemistry, Hajdrihova 19, 1000 Ljubljana, Slovenia

<sup>d</sup>Department of Surface Engineering, Jožef Stefan Institute, Jamova 39, 1000 Ljubljana, Slovenia

<sup>e</sup>Slovenian NMR Center, National Institute of Chemistry, Hajdrihova 19, 1000 Ljubljana, Slovenia

<sup>f</sup>DBT-National Institute of Animal Biotechnology (DBT-NIAB), Hyderabad, Telangana 500032, India.

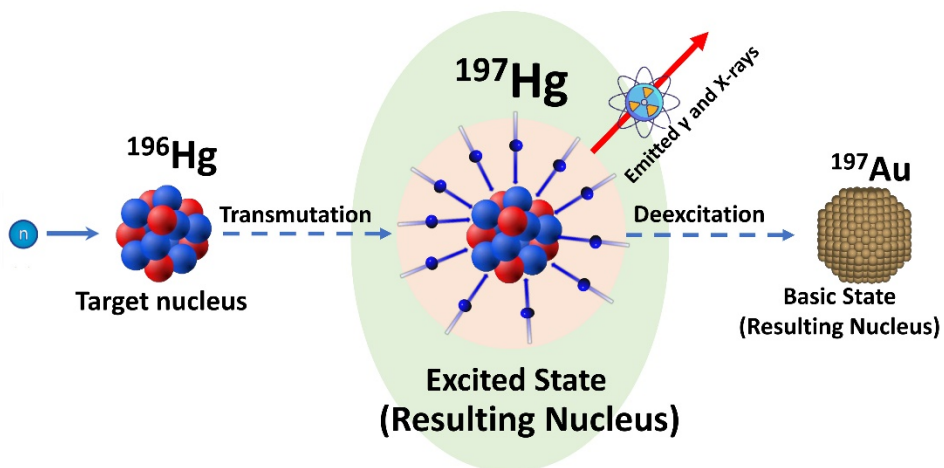

**Fig. S1.** A schematic representation of the reaction mechanism for generating  $^{197}\text{Hg}$  radiotracer.

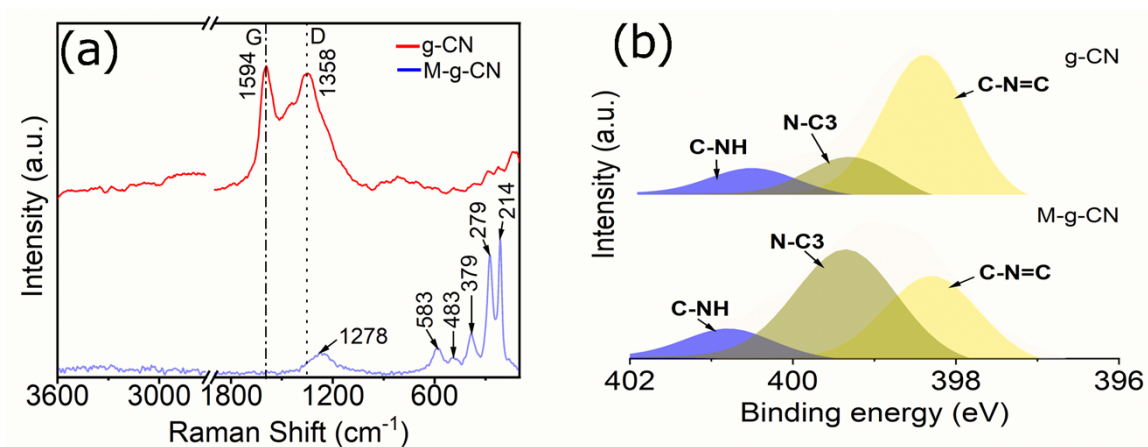

**Fig. S2** (a) Raman, and (b) N1 XPS profile of g-CN and M-g-CN

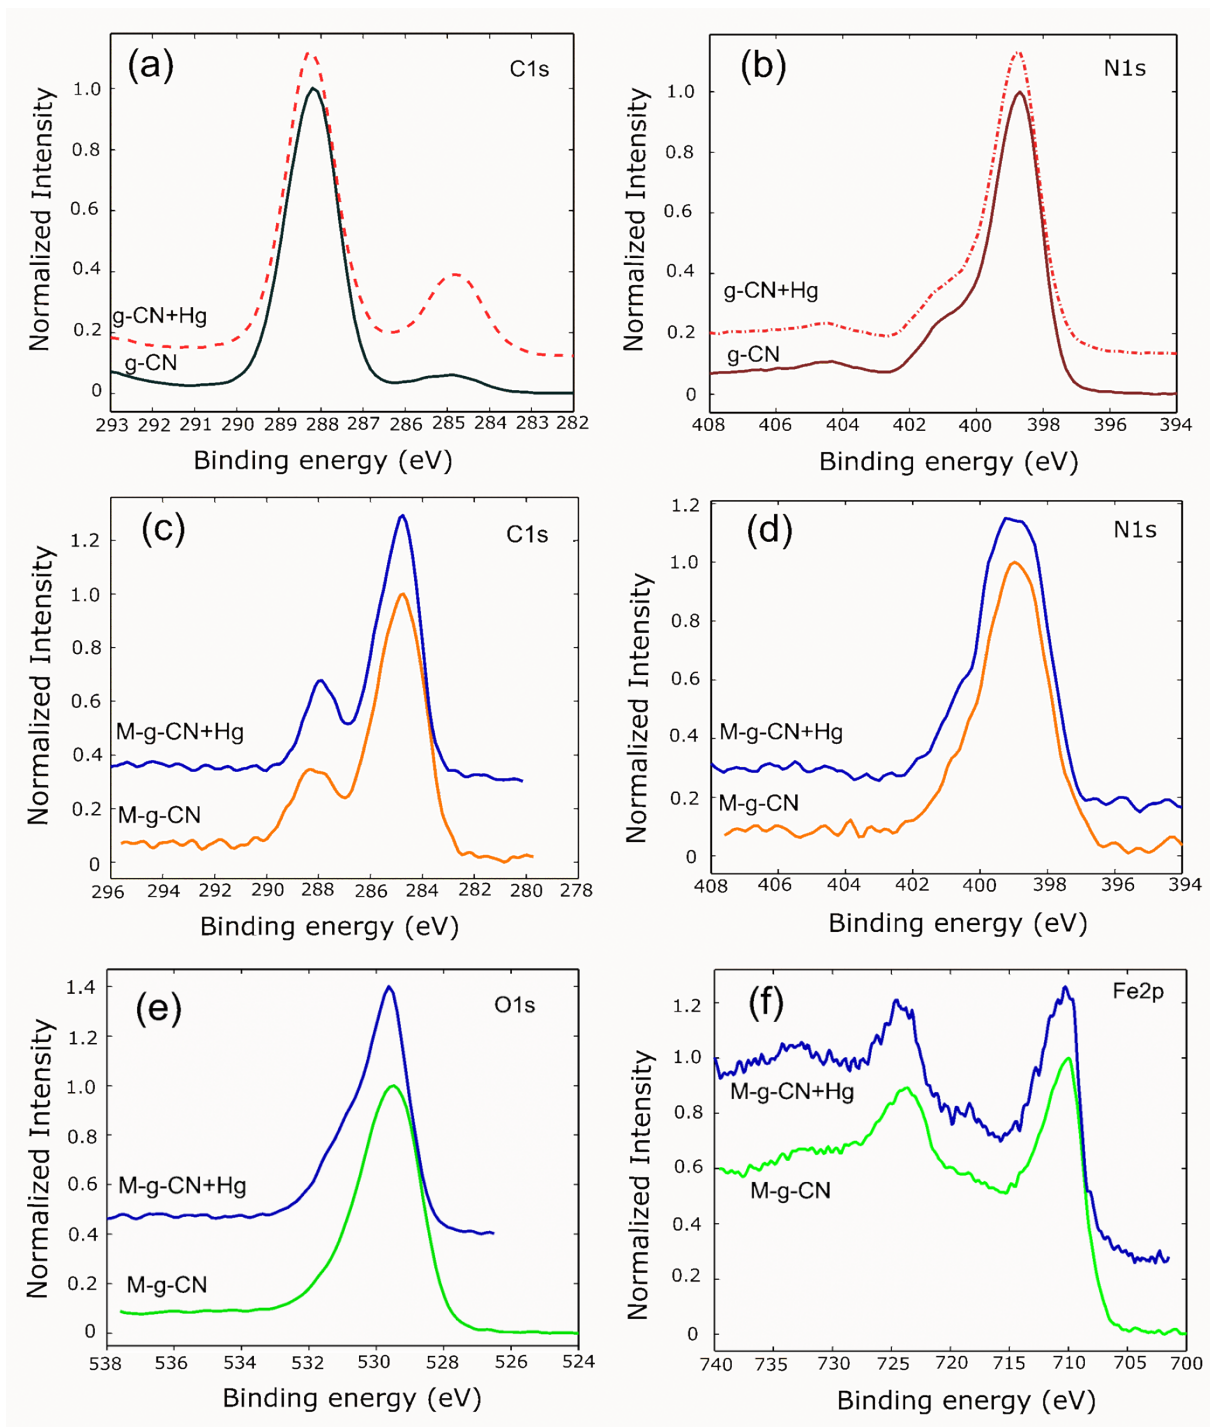

**Fig S3.** XPS spectra of as-prepared samples. **(a,b)** C1s and N1s of g-CN with and without  $\text{Hg}^{2+}$ . **(c,d)** M-g-CN with and without  $\text{Hg}^{2+}$ . **(e,f)** O1s spectra and Fe2p survey spectra of both samples.

**Table S1.** Surface elemental arrangement of the samples in at.% calculated from survey spectra (**Fig S3f.**)

| Sample                   | C    | N    | O    | Na  | Fe   | Hg  | Cl  |
|--------------------------|------|------|------|-----|------|-----|-----|
| Without Hg <sup>2+</sup> | 24.3 | 6.4  | 51.5 | 3.0 | 14.9 |     |     |
| With Hg <sup>2+</sup>    | 46.0 | 12.8 | 30.9 | 0.5 | 8.0  | 0.5 | 1.4 |

### 1. Analysis of samples using CP-MAS-NMR

The coordination of ions in g-CN+Hg<sup>2+</sup> was demonstrated using <sup>13</sup>C and <sup>15</sup>N CP-MAS NMR spectra of g-CN and g-CN+Hg<sup>2+</sup>. The <sup>13</sup>C CP-MAS NMR spectrum of g-CN showed two groups of signals (Fig S4). The low-field signals between  $\delta$  160 and 170 ppm corresponded to carbon atoms adjacent to the amino groups (Fig S6, 1). The signals observed for carbon atoms marked (Fig S6, 2) resonated between  $\delta$  152 and 160 ppm. In the <sup>15</sup>N CP-MAS NMR spectrum of g-CN, a signal at  $\delta$  -245 ppm was observed, which belonged to the bridging nitrogen atom marked (Fig S6, 5), while the outer ring nitrogen atoms (Fig S6, 4) resonated between  $\delta$  -170 and -210 ppm (Fig S5a). The signals for amino nitrogen atoms (Fig S6, 3) appeared between  $\delta$  -260 and -285 ppm (Fig S5a). Changes in the shape and chemical shifts of signals in the <sup>13</sup>C and <sup>15</sup>N CP-MAS NMR spectra, particularly for the outer ring nitrogen atoms between  $\delta$  -170 and -210 ppm, were observed after salt soaking, indicating the coordination of Hg cations with the heptazine rings of g-CN (Figs S4 and S5b). Similar changes in <sup>13</sup>C and <sup>15</sup>N CP-MAS NMR spectra have been previously observed in g-CN soaked with KCl.<sup>1</sup>

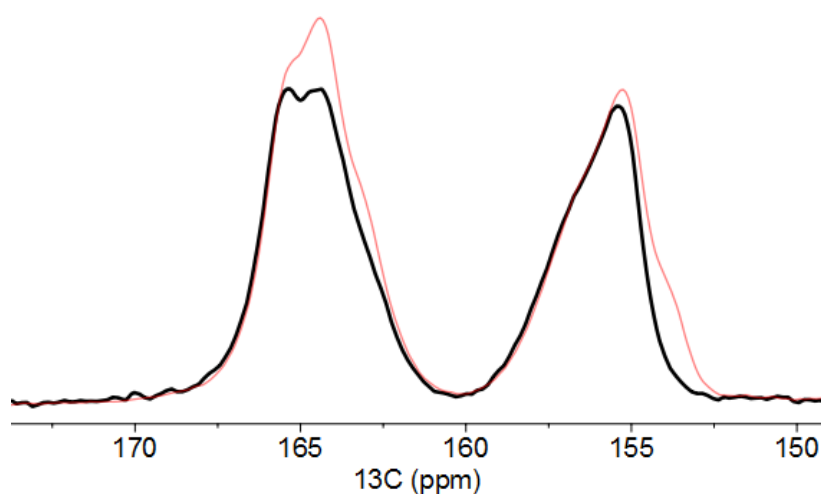

**Fig S4** <sup>13</sup>C CP-MAS of g-CN (black) and g-CN+ Hg<sup>2+</sup> (red). The observed variations in signal shape and chemical shifts among the spectra indicate an interaction between Hg<sup>2+</sup> and g-CN. Chemical shifts were referenced to tetramethylsilane. The spectra were obtained using a 600 MHz NMR spectrometer with a spinning rate of 16 kHz.

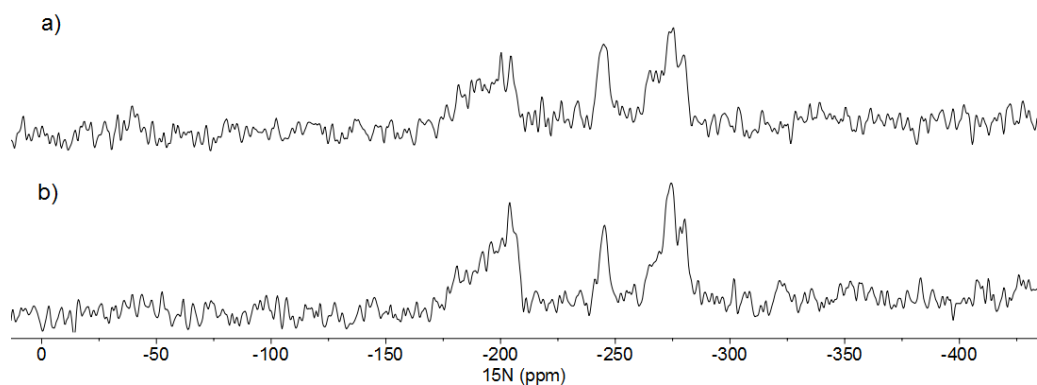

**Fig S5.**  $^{15}\text{N}$  CP-MAS of g-CN (a) and g-CN+ $\text{Hg}^{2+}$  (b). A significant difference is noticeable in the signals attributed to the outer ring nitrogen atoms marked with 4 in Fig S6, resonating between  $\delta$  -170 and -210 ppm, suggesting the coordination of Hg cations with the heptazine rings of g-CN. Chemical shifts were referenced to nitromethane. The spectra were obtained using a 600 MHz NMR spectrometer with a spinning rate of 10 kHz.

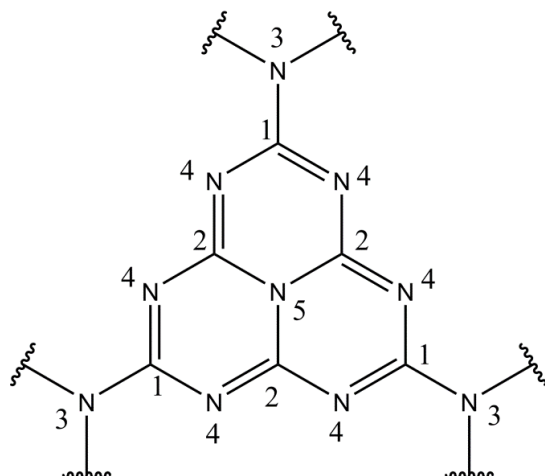

**Fig S6.** Heptazine core with atom numbering.

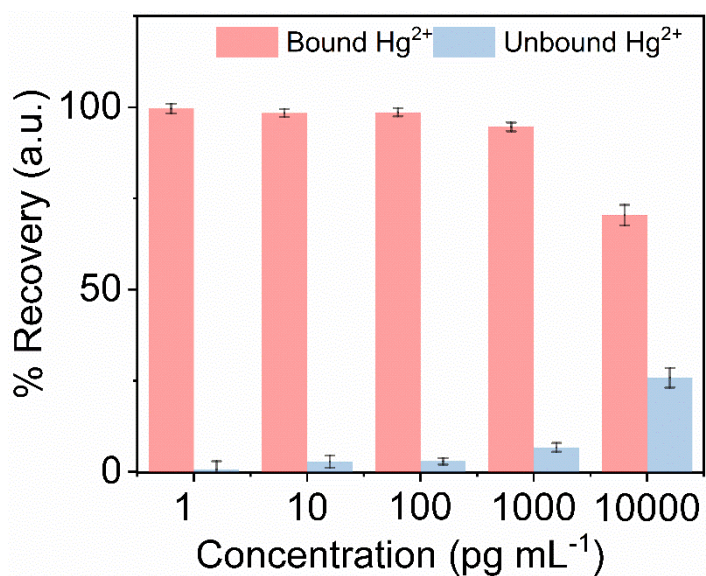

**Fig S7.** Binding efficiency of M-g-CN with different concentrations of  $\text{Hg}^{2+}$ .

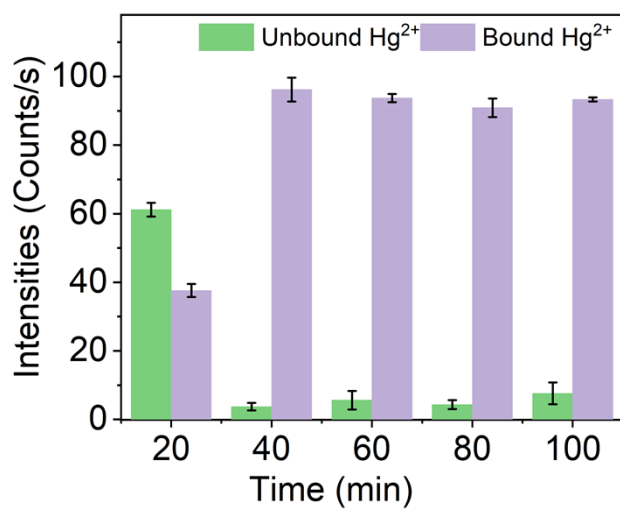

**Fig S8.** Amount of time required by M-g-CN to bind  $\text{Hg}^{2+}$  in the solution.

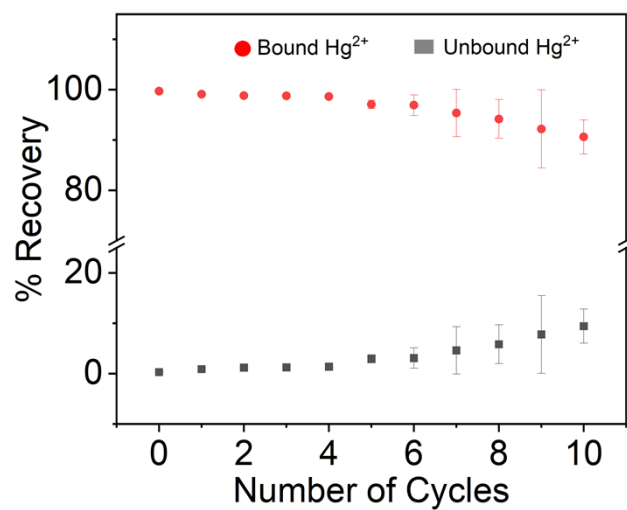

**Fig S9.** Reusability studies of as synthesized M-g-CN with repeated cycles of  $\text{Hg}^{2+}$  binding.

**Table S2.** Maximum binding efficiency of M-g-CN with different concentrations of Hg<sup>2+</sup>

| Amount of Material (mg mL <sup>-1</sup> ) | Trials | Concentration of Hg <sup>2+</sup> (pg mL <sup>-1</sup> ) | Recoveries of Hg <sup>2+</sup> expressed as % of the spiked Hg <sup>2+</sup> concentration |                                          |                                                    |                                            |
|-------------------------------------------|--------|----------------------------------------------------------|--------------------------------------------------------------------------------------------|------------------------------------------|----------------------------------------------------|--------------------------------------------|
|                                           |        |                                                          | Hg <sup>2+</sup> adsorbed on the material (M-g-CN)                                         |                                          | Hg <sup>2+</sup> remains in the solution (Unbound) |                                            |
|                                           |        |                                                          | Bound Hg <sup>2+</sup>                                                                     | Average (± SD) of bound Hg <sup>2+</sup> | Unbound Hg <sup>2+</sup>                           | Average (± SD) of unbound Hg <sup>2+</sup> |
| 100                                       | I      | 1                                                        | 99.65                                                                                      | 99.35 (± 0.35)                           | 0.71                                               | 0.97 (± 0.36)                              |
|                                           | II     | 1                                                        | 99.12                                                                                      |                                          | 1.23                                               |                                            |
| 100                                       | I      | 10                                                       | 98.99                                                                                      | 98.18 (± 1.14)                           | 2.83                                               | 2.16 (± 0.94)                              |
|                                           | II     | 10                                                       | 97.37                                                                                      |                                          | 1.49                                               |                                            |
| 100                                       | I      | 100                                                      | 98.99                                                                                      | 98.84 (± 0.20)                           | 2.29                                               | 2.45 (± 0.07)                              |
|                                           | II     | 100                                                      | 98.71                                                                                      |                                          | 2.62                                               |                                            |
| 100                                       | I      | 1000                                                     | 95.88                                                                                      | 94.99 (± 1.25)                           | 6.76                                               | 6.2 (± 0.70)                               |
|                                           | II     | 1000                                                     | 94.11                                                                                      |                                          | 5.77                                               |                                            |
| 100                                       | I      | 10000                                                    | 71.05                                                                                      | 70.91 (± 0.19)                           | 24.45                                              | 25.18 (± 1.03)                             |
|                                           | II     | 10000                                                    | 70.77                                                                                      |                                          | 25.91                                              |                                            |

**Table S3.** Real matrices recovery studies

| Matrices      | Trials | Spiked Hg <sup>2+</sup> (pg mL <sup>-1</sup> ) | Recoveries of Hg <sup>2+</sup> expressed as % of the spiked Hg concentration |                                          |                                                    |                                            |
|---------------|--------|------------------------------------------------|------------------------------------------------------------------------------|------------------------------------------|----------------------------------------------------|--------------------------------------------|
|               |        |                                                | Hg <sup>2+</sup> adsorbed on the material (M-g-CN)                           |                                          | Hg <sup>2+</sup> remains in the solution (Unbound) |                                            |
|               |        |                                                | Bound Hg <sup>2+</sup>                                                       | Average (± SD) of bound Hg <sup>2+</sup> | Unbound Hg <sup>2+</sup>                           | Average (± SD) of unbound Hg <sup>2+</sup> |
| Marine        | I      | 50                                             | 96.7                                                                         | 96.0 (± 1.08)                            | 4.55                                               | 4.53 (± 0.03)                              |
|               | II     | 50                                             | 95.2                                                                         |                                          | 4.51                                               |                                            |
| Stream        | I      | 50                                             | 98.0                                                                         | 97.5 (± 0.61)                            | 3.22                                               | 3.56 (± 0.49)                              |
|               | II     | 50                                             | 97.1                                                                         |                                          | 3.29                                               |                                            |
| Precipitation | I      | 50                                             | 98.6                                                                         | 98.2 (± 0.44)                            | 2.89                                               | 2.69 (± 0.28)                              |
|               | II     | 50                                             | 97.9                                                                         |                                          | 2.50                                               |                                            |
| Ultra-pure    | I      | 50                                             | 99.8                                                                         | 99.4 (± 0.57)                            | 0.19                                               | 0.14 (± 0.06)                              |
|               | II     | 50                                             | 99.0                                                                         |                                          | 0.10                                               |                                            |

**Table S4.** Interference studies

| Interfering Ions          | Ions Concentration (µg mL <sup>-1</sup> )<br>Natural Environment | Hg <sup>2+</sup> Concentration (pg mL <sup>-1</sup> ) | Trials | Recoveries of Hg <sup>2+</sup> expressed as % of the spiked Hg <sup>2+</sup> concentration |                                          |                                                    |                                            |
|---------------------------|------------------------------------------------------------------|-------------------------------------------------------|--------|--------------------------------------------------------------------------------------------|------------------------------------------|----------------------------------------------------|--------------------------------------------|
|                           |                                                                  |                                                       |        | Hg <sup>2+</sup> adsorbed on the material (M-g-CN)                                         |                                          | Hg <sup>2+</sup> remains in the solution (Unbound) |                                            |
|                           |                                                                  |                                                       |        | Bound Hg <sup>2+</sup>                                                                     | Average (± SD) of bound Hg <sup>2+</sup> | Unbound Hg <sup>2+</sup>                           | Average (± SD) of unbound Hg <sup>2+</sup> |
| Na <sup>+</sup><br>Marine | 11000                                                            | 50                                                    | I      | 99.78                                                                                      | 99.38 (± 0.55)                           | 1.69                                               | 1.40 (± 0.40)                              |
|                           | 11000                                                            | 50                                                    | II     | 98.99                                                                                      |                                          | 1.12                                               |                                            |
| Na <sup>+</sup><br>Stream | 10                                                               | 50                                                    | I      | 98.71                                                                                      | 97.78 (± 1.30)                           | 3.84                                               | 3.11 (± 1.32)                              |
|                           | 10                                                               | 50                                                    | II     | 96.86                                                                                      |                                          | 2.39                                               |                                            |
| K <sup>+</sup>            | 200                                                              | 50                                                    | I      | 98.66                                                                                      | 98.83 (± 0.24)                           | 1.39                                               | 2.19 (± 1.13)                              |
|                           | 200                                                              | 50                                                    | II     | 99.01                                                                                      |                                          | 2.99                                               |                                            |
| Ca <sup>+</sup>           | 400                                                              | 50                                                    | I      | 99.54                                                                                      | 100.05 (± 0.65)                          | 0.95                                               | 1.25 (± 0.43)                              |
|                           | 400                                                              | 50                                                    | II     | 100.47                                                                                     |                                          | 1.56                                               |                                            |
| Ag <sup>+</sup>           | 0.002                                                            | 50                                                    | I      | 97.11                                                                                      | 97.56 (± 0.64)                           | 3.53                                               | 3.22 (± 0.44)                              |
|                           | 0.002                                                            | 50                                                    | II     | 98.02                                                                                      |                                          | 2.92                                               |                                            |
| Co <sup>2+</sup>          | 0.01                                                             | 50                                                    | I      | 99.32                                                                                      | 99.77 (± 0.63)                           | 1.81                                               | 1.39 (± 0.58)                              |
|                           | 0.01                                                             | 50                                                    | II     | 100.22                                                                                     |                                          | 0.98                                               |                                            |

|                  |                    |    |    |        |                |      |               |
|------------------|--------------------|----|----|--------|----------------|------|---------------|
| Zn <sup>2+</sup> | 10                 | 50 | I  | 97.99  | 98.33 (± 0.48) | 3.93 | 3.34 (± 0.83) |
|                  | 10                 | 50 | II | 98.67  |                | 2.75 |               |
| Fe <sup>3+</sup> | 0.03               | 50 | I  | 95.94  | 97.23 (± 1.83) | 3.63 | 4.13 (± 0.70) |
|                  | 0.03               | 50 | II | 98.53  |                | 4.63 |               |
| Mn <sup>2+</sup> | 0.2                | 50 | I  | 100.11 | 99.55 (± 0.63) | 0.59 | 0.74 (± 0.21) |
|                  | 0.2                | 50 | II | 99.1   |                | 0.95 |               |
| Ni <sup>2+</sup> | 0.002              | 50 | I  | 99.88  | 99.57 (± 0.43) | 0.06 | 0.42 (± 0.50) |
|                  | 0.002              | 50 | II | 99.27  |                | 0.78 |               |
| Bi <sup>3+</sup> | 1x10 <sup>-5</sup> | 50 | I  | 98.99  | 98.01 (± 1.40) | 2.62 | 3.16 (± 0.77) |
|                  | 1x10 <sup>-5</sup> | 50 | II | 97.01  |                | 3.71 |               |
| Cl <sup>-</sup>  | 35000              | 50 | I  | 99.7   | 99.88 (± 0.26) | 0.66 | 0.49 (± 0.23) |
|                  | 35000              | 50 | II | 100.07 |                | 0.33 |               |
| Br <sup>-</sup>  | 70                 | 50 | I  | 99.71  | 99.35 (± 0.50) | 1.82 | 1.77 (± 0.07) |
|                  | 70                 | 50 | II | 99.43  |                | 1.72 |               |
| I <sup>-</sup>   | 1                  | 50 | I  | 96.27  | 97.42 (± 1.62) | 4.71 | 3.76 (± 1.34) |
|                  | 1                  | 50 | II | 98.57  |                | 2.81 |               |

**Table S5.** Reusability studies

| No. of Reusable Cycles | Trials | Concentration of Hg <sup>2+</sup> (pg mL <sup>-1</sup> ) | Recoveries of Hg <sup>2+</sup> expressed as % of the spiked Hg <sup>2+</sup> concentration |                                          |                                                    |                                            |
|------------------------|--------|----------------------------------------------------------|--------------------------------------------------------------------------------------------|------------------------------------------|----------------------------------------------------|--------------------------------------------|
|                        |        |                                                          | Hg <sup>2+</sup> adsorbed on the material (M-g-CN)                                         |                                          | Hg <sup>2+</sup> remains in the solution (Unbound) |                                            |
|                        |        |                                                          | Bound Hg <sup>2+</sup>                                                                     | Average (± SD) of bound Hg <sup>2+</sup> | Unbound Hg <sup>2+</sup>                           | Average (± SD) of unbound Hg <sup>2+</sup> |
| 0                      | I      | 100                                                      | 99.66                                                                                      | 99.70 (± 0.06)                           | 0.34                                               | 0.29 (± 0.06)                              |
|                        | II     | 100                                                      | 99.75                                                                                      |                                          | 0.25                                               |                                            |
| 1                      | I      | 100                                                      | 98.92                                                                                      | 99.14 (± 0.31)                           | 0.18                                               | 0.80 (± 0.87)                              |
|                        | II     | 100                                                      | 99.37                                                                                      |                                          | 1.42                                               |                                            |
| 2                      | I      | 100                                                      | 98.85                                                                                      | 98.81 (± 0.04)                           | 1.43                                               | 1.38 (± 0.07)                              |
|                        | II     | 100                                                      | 98.78                                                                                      |                                          | 1.32                                               |                                            |
| 3                      | I      | 100                                                      | 98.77                                                                                      | 98.75 (± 0.02)                           | 1.23                                               | 1.19 (± 0.05)                              |
|                        | II     | 100                                                      | 98.73                                                                                      |                                          | 1.15                                               |                                            |
| 4                      | I      | 100                                                      | 98.24                                                                                      | 98.60 (± 0.50)                           | 1.76                                               | 1.40 (± 0.50)                              |
|                        | II     | 100                                                      | 98.96                                                                                      |                                          | 1.04                                               |                                            |
| 5                      | I      | 100                                                      | 96.93                                                                                      | 97.06 (± 0.19)                           | 3.10                                               | 2.83 (± 0.38)                              |
|                        | II     | 100                                                      | 97.20                                                                                      |                                          | 2.55                                               |                                            |
| 6                      | I      | 100                                                      | 96.85                                                                                      | 96.91 (± 0.09)                           | 2.36                                               | 2.94 (± 0.81)                              |
|                        | II     | 100                                                      | 96.98                                                                                      |                                          | 3.52                                               |                                            |
| 7                      | I      | 100                                                      | 95.11                                                                                      | 95.36 (± 0.36)                           | 1.66                                               | 3.10 (± 2.03)                              |
|                        | II     | 100                                                      | 95.62                                                                                      |                                          | 4.54                                               |                                            |
| 8                      | I      | 100                                                      | 95.36                                                                                      | 94.17 (± 1.67)                           | 5.80                                               | 5.43 (± 0.55)                              |
|                        | II     | 100                                                      | 92.99                                                                                      |                                          | 5.03                                               |                                            |
| 9                      | I      | 100                                                      | 92.10                                                                                      | 92.18 (± 0.12)                           | 13.3                                               | 7.79 (± 7.72)                              |
|                        | II     | 100                                                      | 92.27                                                                                      |                                          | 2.33                                               |                                            |
| 10                     | I      | 100                                                      | 90.06                                                                                      | 90.58 (± 0.74)                           | 7.92                                               | 8.11 (± 0.25)                              |
|                        | II     | 100                                                      | 91.11                                                                                      |                                          | 8.29                                               |                                            |

**Reference:**

- 1 H. Gao, S. Yan, J. Wang and Z. Zou, *Dalt. Trans.*, 2014, **43**, 8178–8183.
